# Supplementary material
Source: PubMed Central journal article supplement (PMC4237981)
Supplement: supp_37.12.3336v140574_DC140574SupplementaryData.pdf [file supp_37.12.3336v140574_DC140574SupplementaryData.pdf]

## SUPPLEMENTARY DATA

### Supplementary Text.

The writing group for this manuscript wishes to acknowledge the contributions of the following individuals to the SEARCH for Diabetes in Youth Study:

*California:* Jean M. Lawrence, ScD, MPH, MSSA, Kristi Reynolds, PhD, MPH, Mary Helen Black, PhD, Harpreet S. Takhar, MPH, Kim Holmquist, BA, Jin-Wen Hsu, PhD, and Xia Li, MS for the Department of Research & Evaluation and David J. Pettitt, MD, for the Sansum Diabetes Research Institute

*Colorado:* Dana Dabelea, MD, PhD, Richard F. Hamman, MD, DrPH, Lisa Testaverde, MS, for the Department of Epidemiology, Colorado School of Public Health, University of Colorado Denver, Georgeanna J. Klingensmith, MD, Marian J. Rewers, MD, PhD, David Maahs, MD and Paul Wadwa, MD for the Barbara Davis Center for Childhood Diabetes, Stephen Daniels, MD, PhD, Kristen Nadeau, MD, Department of Pediatrics and Children's Hospital, Clifford A. Bloch, MD, for the Pediatric Endocrine Associates, Carmelita Sorrelman, MSPH, Jeffrey Powell, MD, MPH, Susie John, MD, MPH, for the Navajo Area Indian Health Promotion Program, Kathy Love-Osborne, MD, for the Denver Health and Hospital Authority, and Carol Greenlee, MD for Western Slope Endocrinology

*Hawaii:* Beatriz L. Rodriguez, MD, MPH, PhD, for Kuakini Medical Center, The University of Hawaii and the Instituto Tecnologico de Monterrey; Wilfred Fujimoto, MD, J. David Curb, MD (deceased), Fiona Kennedy, RN, Greg Uramoto, MD, Sorrell Waxman, MD, and Richard Chung, MD, for Kuakini Medical Center; Beth Waitzfelder, PhD, for the Center for Health Research, Kaiser Permanente Hawaii; and Teresa Hillier, MD for the Center for Health Research, Kaiser Permanente Northwest and Hawaii

*Ohio:* Lawrence M. Dolan, MD, Michael Seid, PhD, Elaine Urbina, MD, MS, Amy Shah, MD, Debra A. Standiford, MSN, CNP for the Cincinnati Children's Hospital Medical Center

*Carolinas:* Elizabeth J. Mayer-Davis, PhD, Joan Thomas MS, RD for the University of North Carolina, Chapel Hill, Anwar Merchant, ScD, Angela D. Liese, PhD, MPH, , Robert R. Moran, PhD, Gladys Gaillard-McBride, RN, CFNP, Malaka Jackson, MD, Lisa Knight, MD for the University of South Carolina, Deborah Bowlby, MD, for the Medical University of South Carolina, James Amrhein, MD, Bryce Nelson, MD for Greenville Health System, Pam Clark, MD for McLeod Pediatric Subspecialists, Mark Parker, MD for Pediatric Endocrinology & Diabetes Specialists, Charlotte, NC

*Washington:* Catherine Pihoker, MD, Maryam Afkarian, MD, Irl Hirsch, MD, Lenna L. Liu, MD, MPH, John Neff, MD, Grace Kim, MD, Craig Taplin, MD, Debika Nandi-Munshi, MD, and Joyce Yi-Frazier, PhD for the University of Washington, Beth Loots, MPH, MSW, Patricia D'Alessandro, MA, Jessica Fosse, MPH RN BSN, Sue Kearns, RN, Mary Klingsheim, RN, Katherine Cochrane, BS, Michael Pascual, BA, and Connor Mitrovich, BA for Seattle Children's Hospital, and Carla Greenbaum, MD for Benaroya Research Institute

*Centers for Disease Control and Prevention:* Giuseppina Imperatore, MD, PhD, Desmond E. Williams, MD, PhD, Henry S. Kahn, MD, Bernice Moore, MBA, Gregg W. Edward, PhD, Sharon H. Saydah, PhD

*National Institute of Diabetes and Digestive and Kidney Diseases, NIH:* Barbara Linder, MD, PhD

*Central Laboratory:* Santica M. Marcovina, PhD, ScD, Vinod P. Gaur, PhD, and Jessica Harting for the University of Washington Northwest Lipid Research Laboratories

*Coordinating Center:* Ronny Bell, PhD, MS, Ralph D'Agostino, Jr., PhD, Jasmin Divers, PhD, Wei Lang, PhD, Timothy Morgan, PhD, Michelle Naughton, PhD, Leora Henkin, MPH, MEd, Gena Hargis, MPH, Maureen T. Goldstein, BA, Jeanette Andrews, MS, Nora Fitzgerald, MS, Scott Isom, MS, Jennifer Talton, MS for Wake Forest School of Medicine
